# Supplementary material for: Global Need for Physical Rehabilitation: Systematic Analysis from the Global Burden of Disease Study 2017
Source: PubMed Central journal article supplement (PMC6466363; doi:10.3390/ijerph16060980), 2019-03-19
Supplement: ijerph-16-00980-s001.pdf [file ijerph-16-00980-s001.pdf]

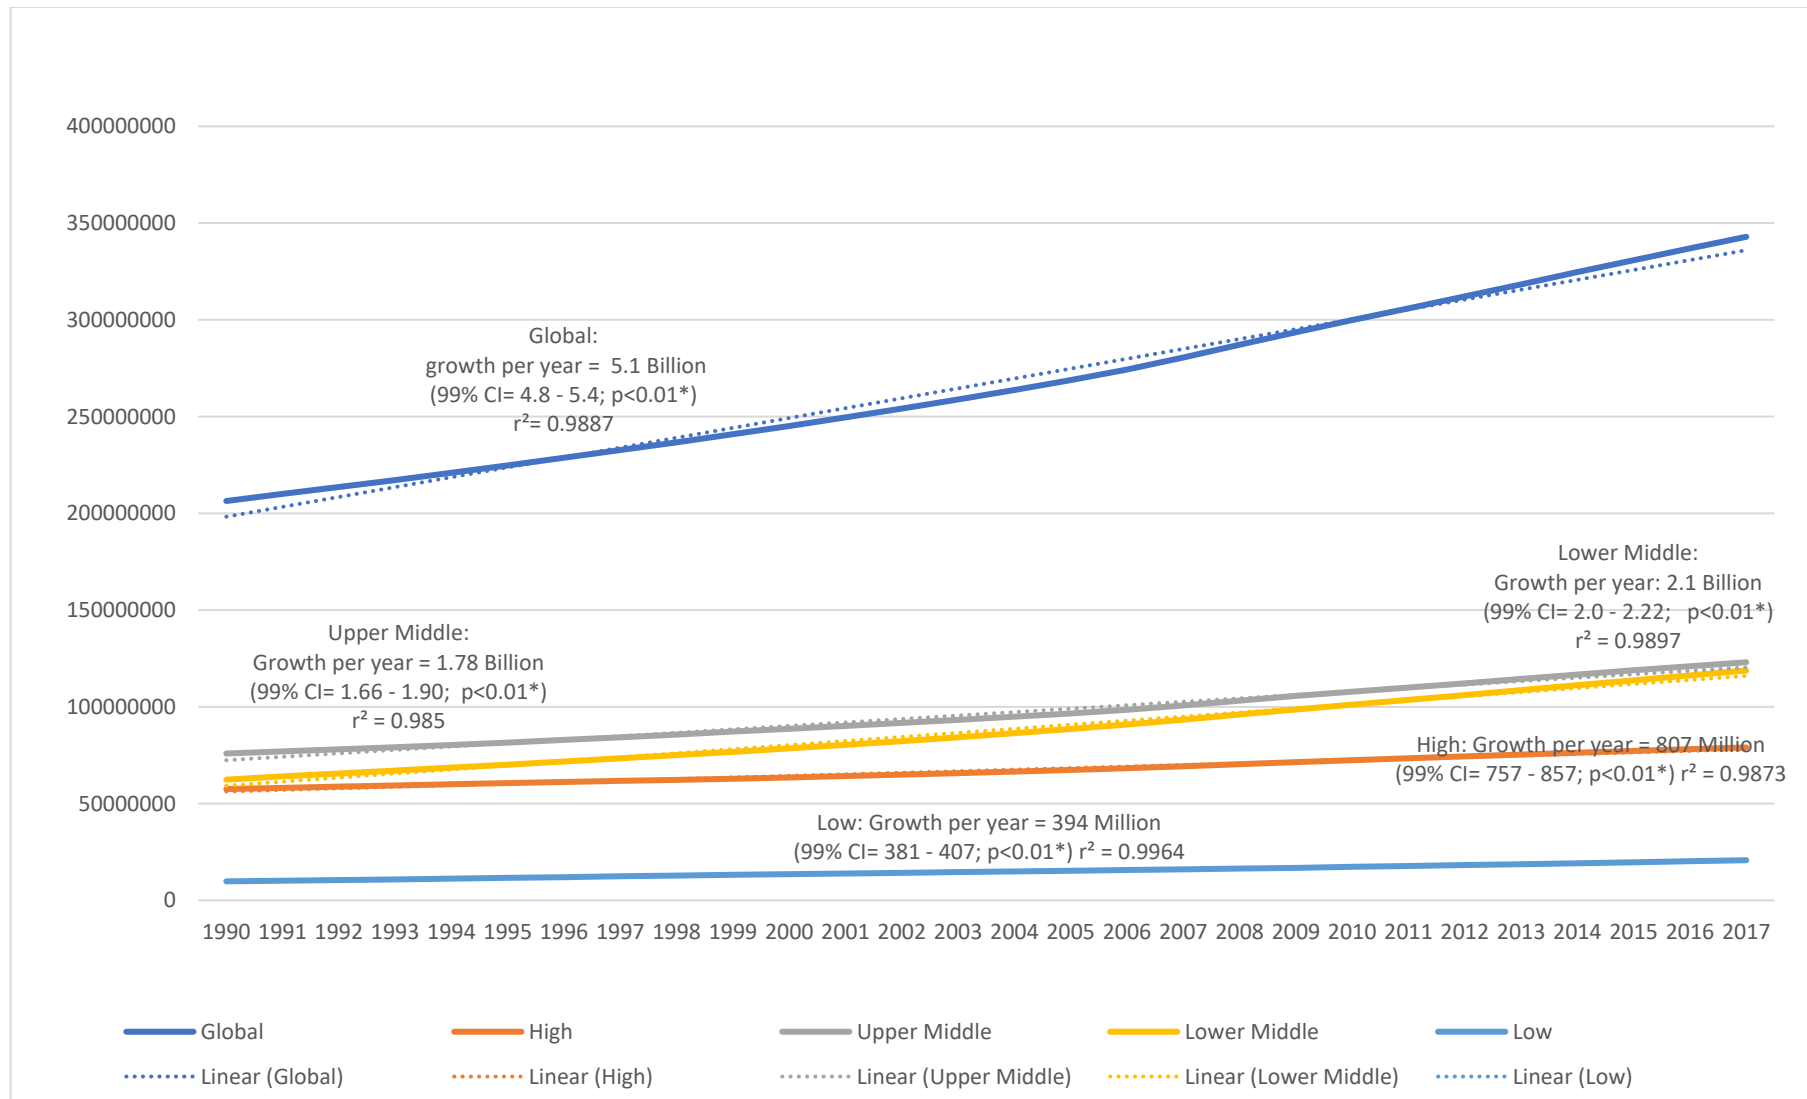

**Figure S1.** YLD Counts likely benefiting from physical rehabilitation along with the “best fit” regression models.

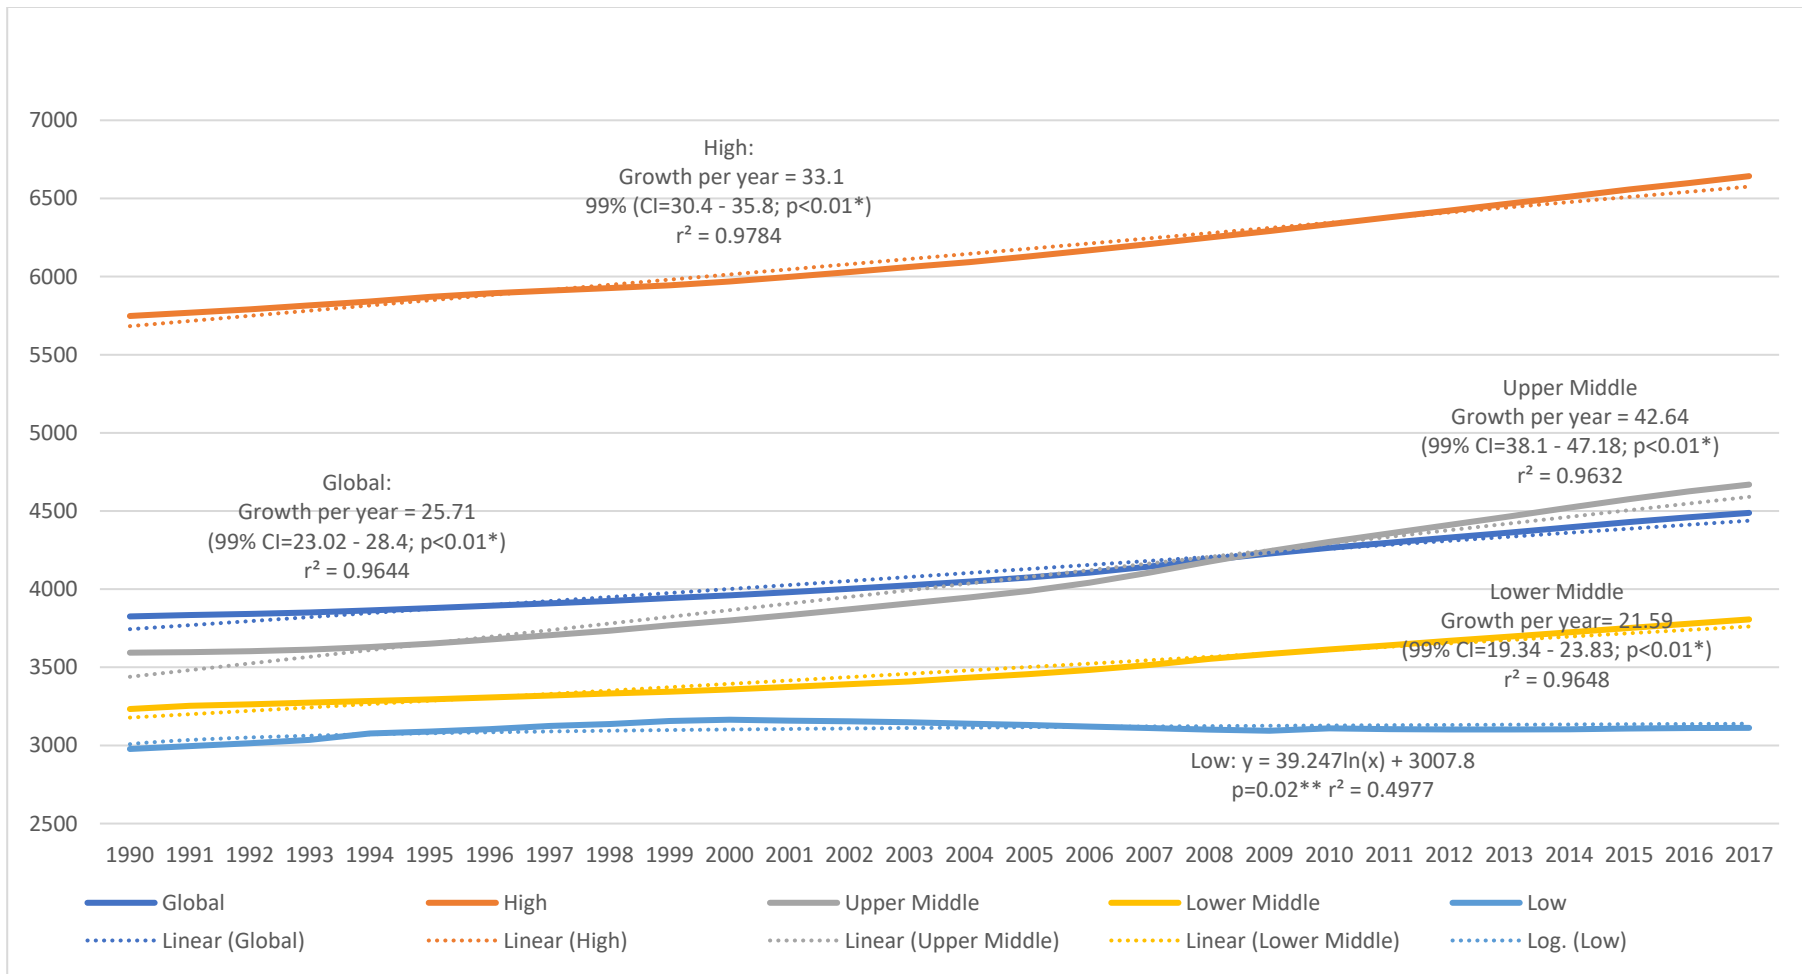

**Figure S2.** YLD Rates (per 100,000 People) likely benefiting from physical rehabilitation along with the “best fit” regression models.

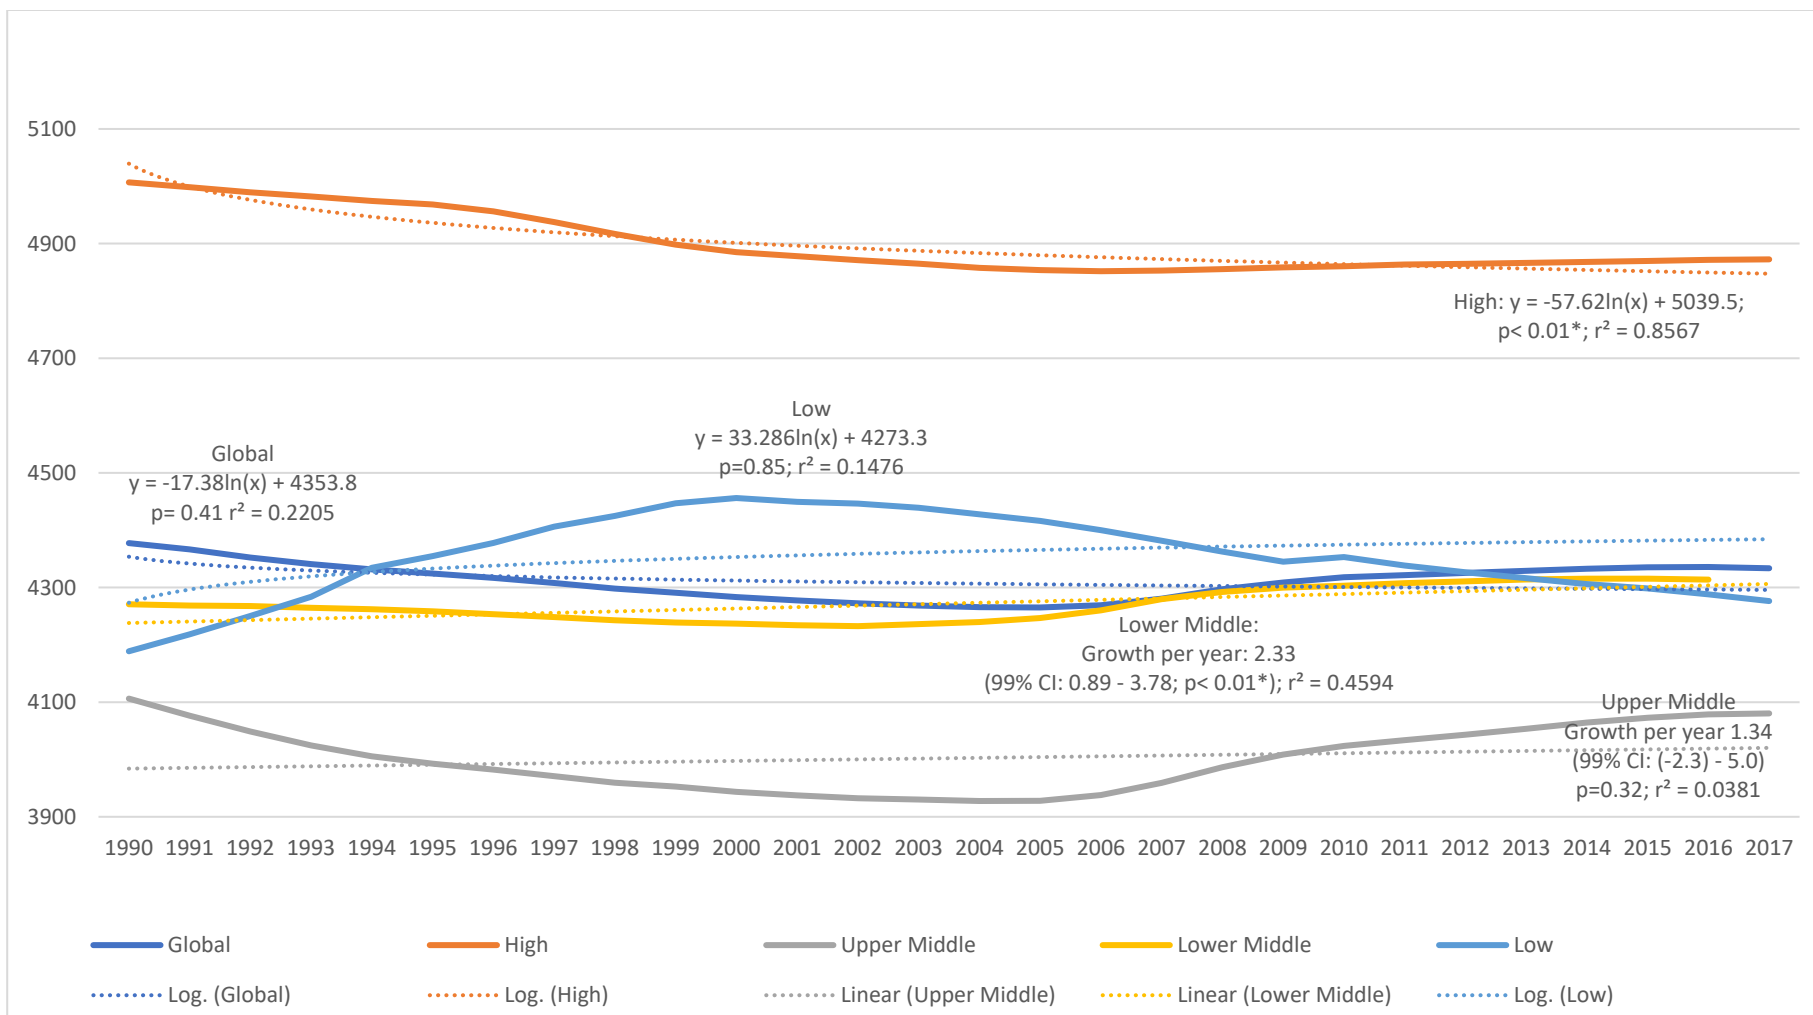

**Figure S3:** Age-standardized YLD Rates likely benefiting from physical rehabilitation along with the “best fit” regression models.
